# Supplementary material
Source: Springer Nature journal article supplement (https://www.springermedizin.de/resource/supplementary/13737_2013_63_MOESM2_ESM.pdf/9682204)

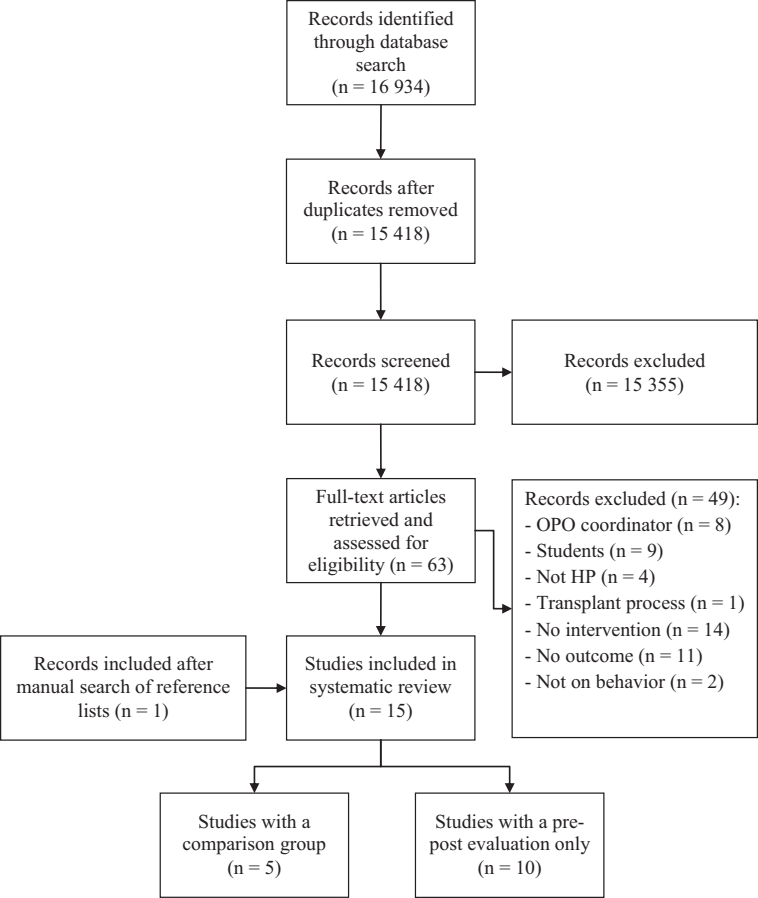

Supplement: MOESM2 [file 9682204]
